# Supplementary material for: Sulfation of thiol–maleimide crosslinked hydrogels modulates material properties and cell biocompatibility
Source: Royal Society of Chemistry journal article supplement (doi:10.1039/d5ma01183c), 2025-12-30
Supplement: d5ma01183c1.pdf [file d5ma01183c1.pdf]

Supplementary Information

**Sulfation of Thiol-Maleimide Crosslinked Hydrogel Modulates  
Material Properties and Cell Biocompatibility**

Lasse Riediger<sup>a</sup>, Lei Wang<sup>a,b</sup>, Peer Nölte<sup>c</sup>, Cosmin Butnarusu<sup>d</sup>, Peng Tang<sup>a</sup>, Yannic Kerkhoff<sup>a,e</sup>, Elisa Quaas<sup>a</sup>, Justin Arenhoevel<sup>a</sup>, Daniel Lauster<sup>d</sup>, Yi-An Yang<sup>a\*</sup>, Nan Ma<sup>a\*</sup>, Rainer Haag<sup>a,f</sup>

a. Institute of Chemistry and Biochemistry, Freie Universität Berlin, Takustraße 3, 14195 Berlin, Germany.

b. Institute of Functional Materials for Sustainability Helmholtz-Zentrum Hereon, 14513 Teltow, Germany

c. Institute of Macromolecular Research (BIMF) and Bavarian Polymer Institute (BPI), University of Bayreuth, Universitätsstr. 30, 95447 Bayreuth, Germany

d. Freie Universität Berlin, Institute of Pharmacy, Biopharmaceuticals, 12169 Germany

e. Zuse-Institut Berlin (ZIB), Takustraße 7, 14195 Berlin, Germany

f. Lead contact

## Degree of Functionalization by $^1\text{H}$ -NMR recorded in $\text{D}_2\text{O}$

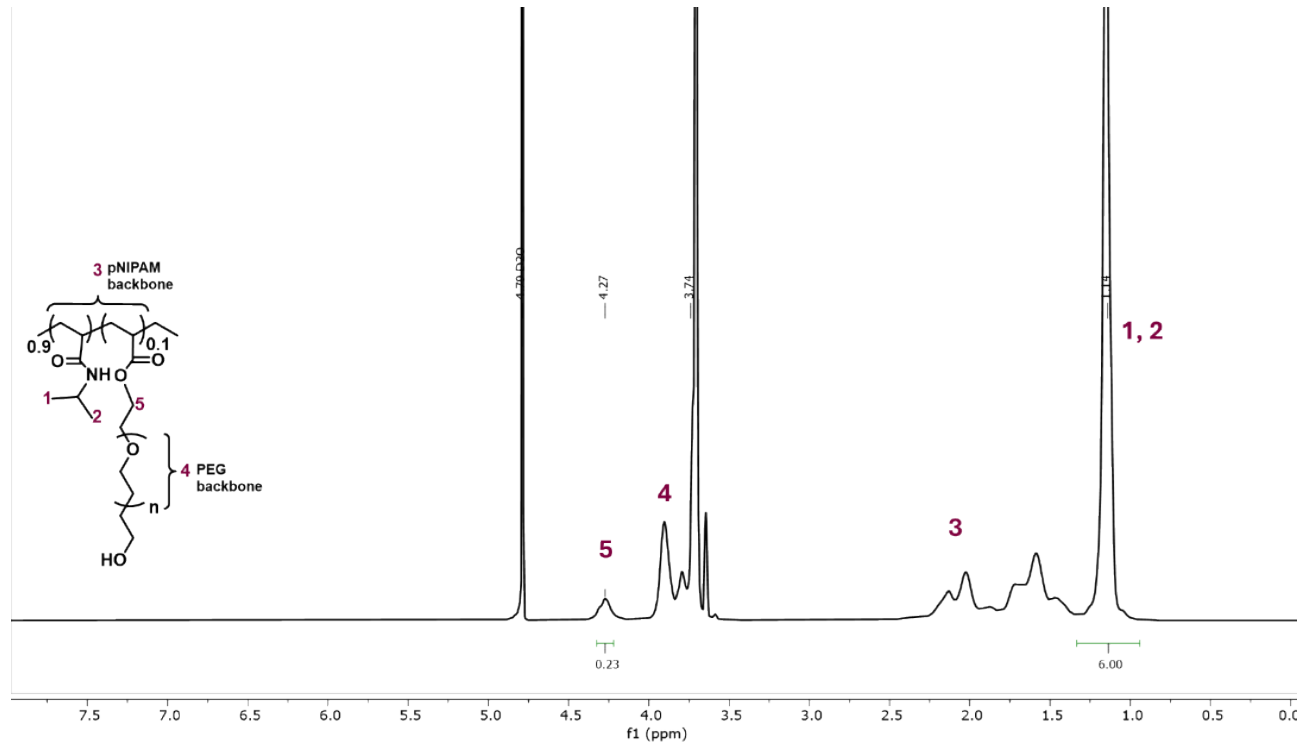

**Figure S 1** The  $^1\text{H}$  NMR spectrum of Copol- $\text{OH}_{(10\%)}$  displays the characteristic proton resonances. The degree of functionalization was determined using Equation 1 with the integration values of signals 1 and 2 relative to signal 5.

**Equation 1:** Degree of Functionalization: Copolymerization

$$DF [\%] = \frac{\left( \frac{\text{peak integral}}{\text{number of protons}} \right)}{1 + \left( \frac{\text{peak integral}}{\text{number of protons}} \right)} * 100 = \frac{\frac{0.23}{2}}{1 + \frac{0.23}{2}} * 100 = 10 \%$$

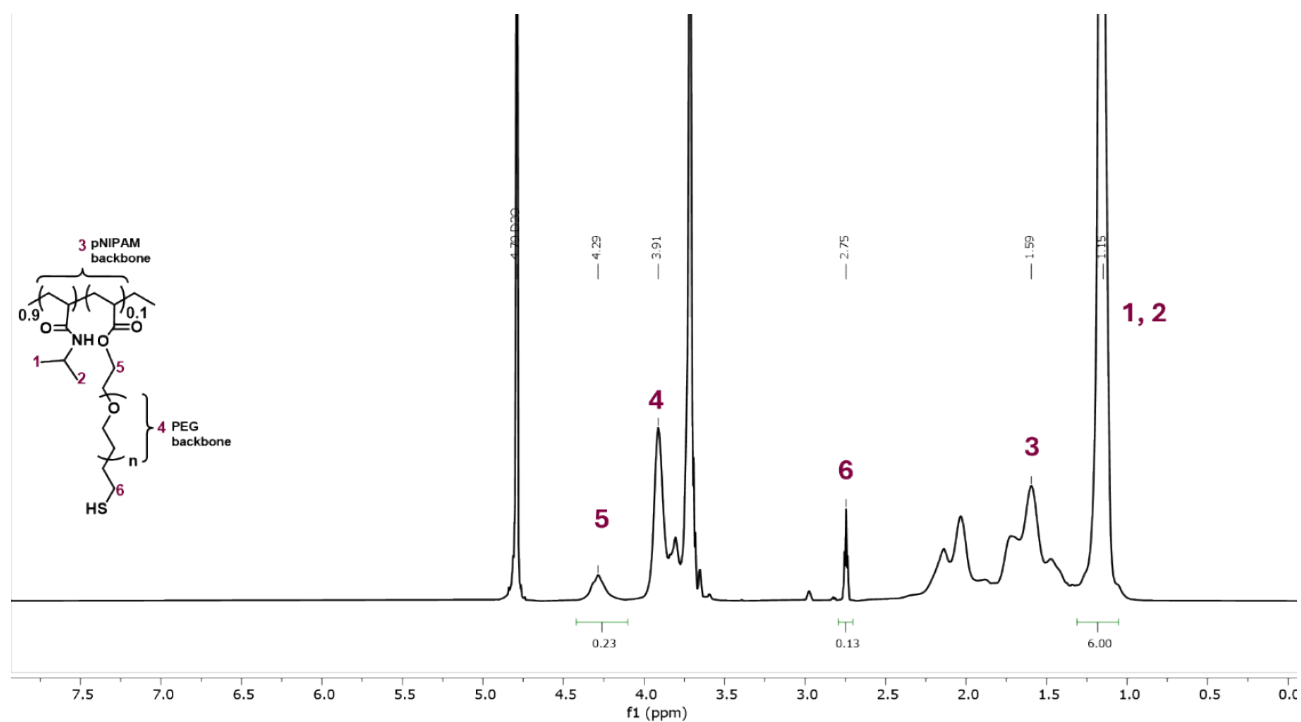

**Figure S 2:** The  $^1\text{H}$  NMR spectrum of Copol-SH(5%) displays the characteristic proton resonances. The degree of functionalization was determined using Equation 1 with the integration values of signals 1 and 2 relative to signal 5 and signal 6 for the mesylgroup next to the free thiol.

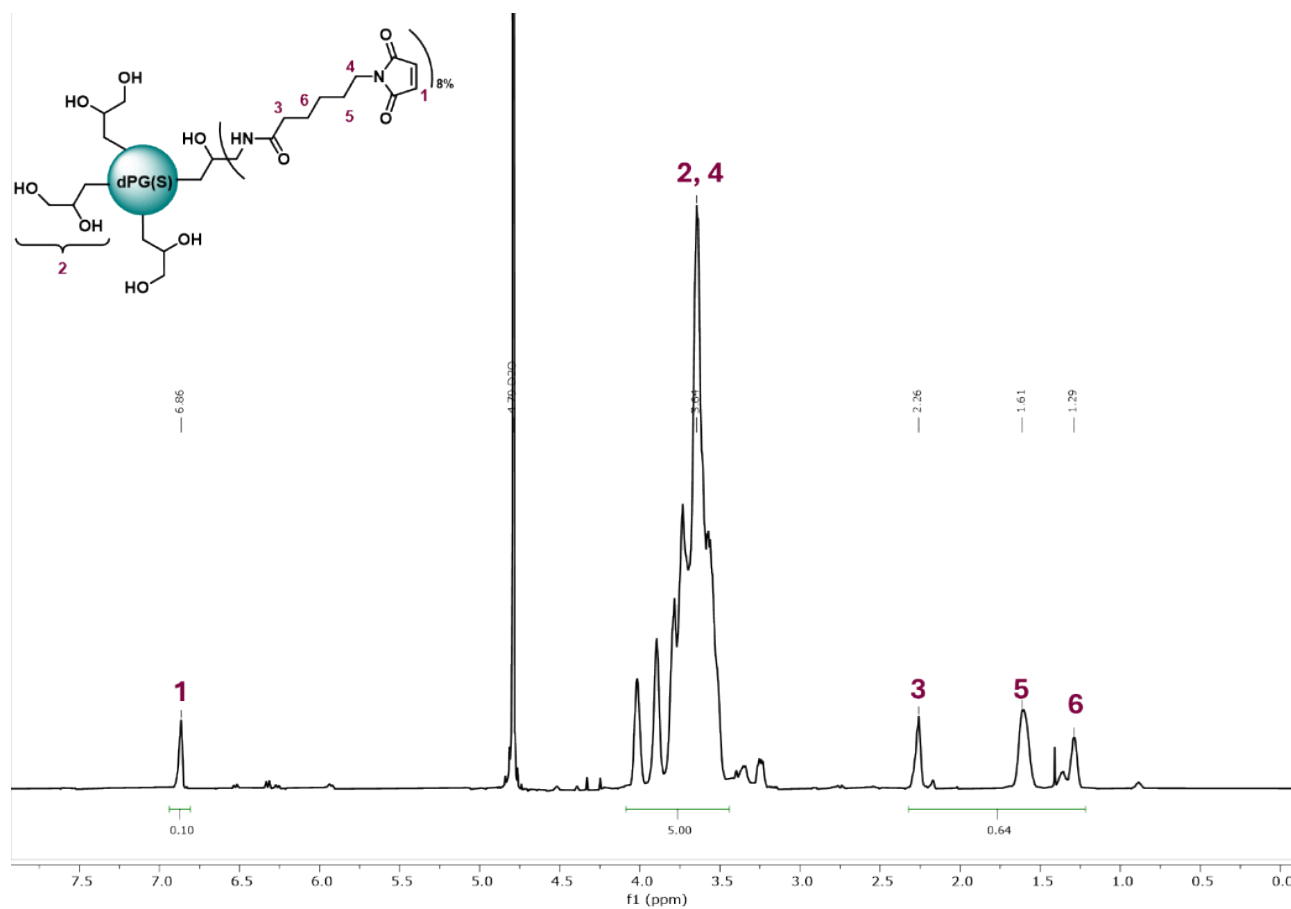

**Figure S 3:** The  $^1\text{H}$  NMR spectrum of dPG(S)-Mal<sub>(8%)</sub> displays the characteristic proton resonances. The degree of functionalization was determined using Equation 1 with the integration values of signals 1 relative to signal 2 for the dPG-backbone and maleimide group.

## Degree of Sulfation by Elemental Analysis

### Equation 2: Degree of Sulfation

$$DS = \frac{M_p + (\#OH \times M_{Sulfate} \times p_s)}{M_s \times \#OH} \times 100$$

Mp = 6500; #OH = 48, ps = 15.5%, Ms=32

**dPGS:** DS = 50% (elemental analysis (EA): N = 1.84, C = 19.22, S = 15.50, H = 3.20)

### Determination of reactive Thiol content by Ellman's Assay

We quantified the number of free, reactive thiol groups of pNIPAM-co-PEG-SH using the Ellman's assay. Herein, the model disulfide 5,5'-dithiobis-(2-nitrobenzoic acid) (DTNB) will be reduced by a thiol group quantitatively releasing the anion TNB<sup>2-</sup>. Monitoring this reduction by UV-Vis-spectroscopy enables the quantification of thiol groups per polymer in reference to a standard molecule. **Copol-SH** was determined to have 5.75 thiol groups per polymer.

The thiol content was also determined by **NMR and GPC** analysis, yielding a value of 7.5 groups per polymer chain. This calculation is based on the integration of methylene protons adjacent to the thiol group; however, oxidized disulfides are difficult to distinguish from this signal. In contrast, the Ellman's assay exclusively quantifies free thiols, providing a direct measure of reactive groups.

### **Zeta potential of dPG-N<sub>3</sub> and dPGS-N<sub>3</sub>**

*Table 1: Overview table of the surface charge by zeta potential*

|                     | <b>ζ (mV)</b> |
|---------------------|---------------|
| dPG-N <sub>3</sub>  | +2.95 ± 1.09  |
| dPGS-N <sub>3</sub> | -29.98 ± 2.51 |

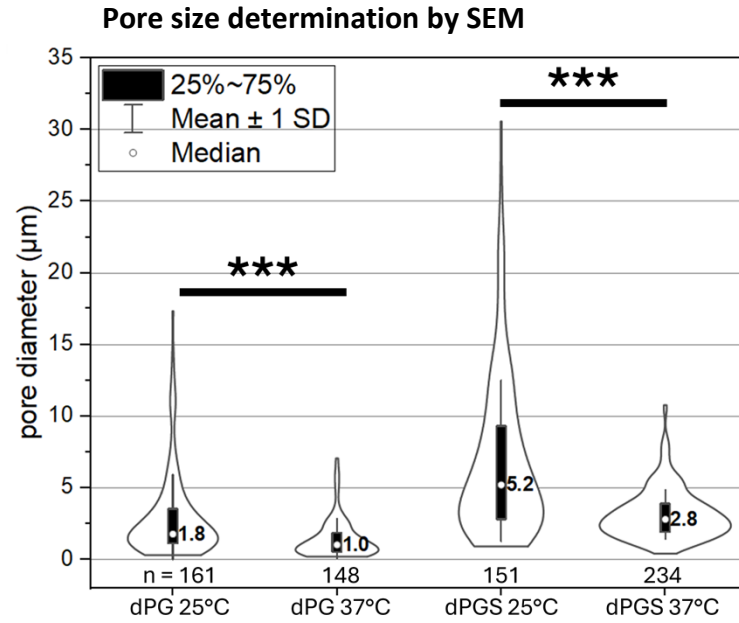

**Figure S 4:** Overview of SEM evaluation at 25°C and 37°C. Custom FIJI macro with two image replicates per condition were analysed, and the resulting data were pooled.

## Hydrogel swelling studies

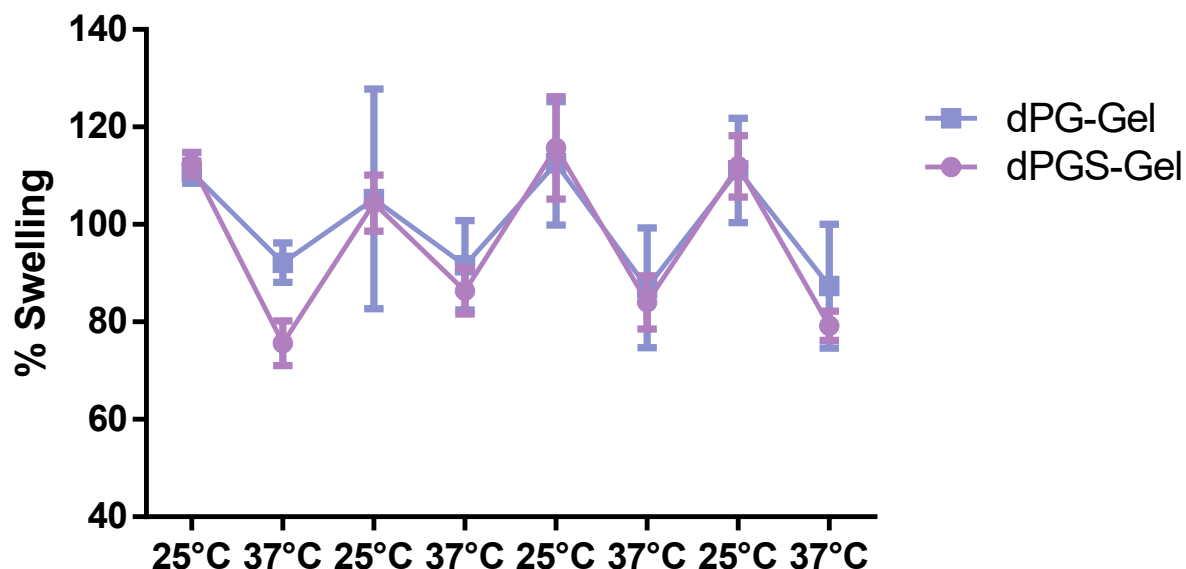

**Figure S 5:** Swelling study of dPG and dPGS hydrogels at 25°C and 37°C.

Hydrogel samples (100  $\mu$ L each) were prepared, and their initial weights were recorded. Subsequently, 200  $\mu$ L of PBS was added to each hydrogel, and the samples were incubated 24 h at 25 °C. After incubation, excess surface liquid was carefully removed, and the hydrogels were measured and weighed.

Following this, the hydrogels were incubated at 37 °C for 2 hours, after which the excess liquid was removed, and the samples were weighed again. To assess the reversibility of the swelling behavior, an additional measurement was performed after adding 200  $\mu$ L of PBS and incubating the hydrogels at 25 °C.



### Fluorescence Recovery After Photobleaching

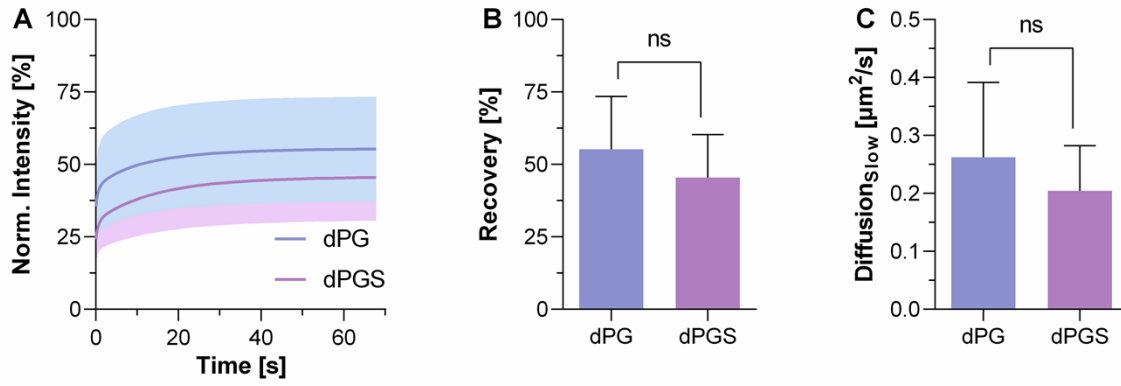

**Figure S 6:** FRAP analysis of FITC–Albumin (FITC-HSA) diffusion in dPG and dPGS hydrogels. (A) Normalized fluorescence recovery over time. (B) Quantified mobile fraction of FITC–dextran. (C) Diffusion kinetics. Data shown as mean  $\pm$  SD

### GAG-like staining (Alcian Blue)

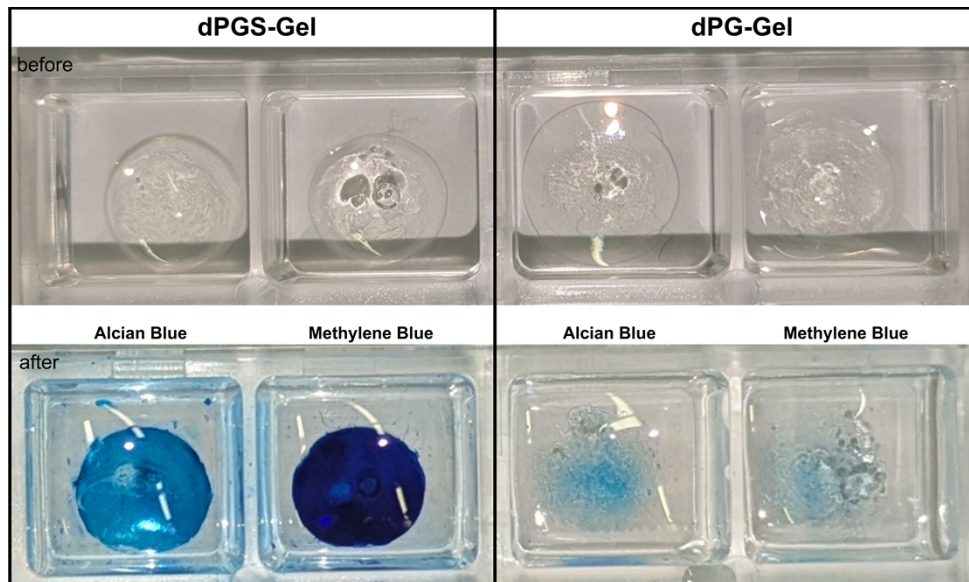

**Figure S 7:** Qualitative Alcian blue and methylene blue staining of dPGS- and dPG-based hydrogels.

dPG- and dPGS-based hydrogels (100  $\mu$ L, 5 wt% each) were formed and washed three times with PBS (15 min per wash) to remove unbound polymer. The gels were then incubated overnight with 300  $\mu$ L of an aqueous Alcian blue / methylene blue solution. On the next day, excess dye was removed, the gels were washed with 1% acetic acid and subsequently three times with PBS. As shown in the photograph provided below, the dPGS hydrogels retained a markedly more intense blue colour after the washing steps than the corresponding dPG hydrogels, which appeared only faintly stained. This GAG-like staining thus qualitatively confirms that the sulfated dPGS networks exhibit substantially stronger binding of positively charged dyes than the non-sulfated dPG networks, consistent with enhanced electrostatic interactions between the sulfate groups and cationic species.

## Overview of the Cell Viability data

**Table 2:** Overview table of cell viability data dPGS-Mal, dPG-Mal, Copol-SH and the corresponding hydrogels with A549, HeLa and MCF7 cells.

|          | Cell viability % |             |            |
|----------|------------------|-------------|------------|
|          | A549             | HeLa        | MCF7       |
| dPGS-Mal | 101.7 ± 5.0      | 98.3 ± 11.4 | 76.9 ± 1.8 |
| dPG-Mal  | 101.3 ± 5.7      | 91.6 ± 9.2  | 96.5 ± 6.0 |
| Copol-SH | 108.6 ± 4.9      | 45.4 ± 7.5  | 63.0 ± 4.4 |
| dPGS-Gel | 93.1 ± 4.2       | 76.0 ± 3.6  | 52.6 ± 3.9 |
| dPG-Gel  | 85.2 ± 2.5       | 59.5 ± 4.8  | 96.1 ± 7.1 |
